# Supplementary material
Source: PubMed Central journal article supplement (PMC5509066)
Supplement: NIHMS847074-supplement-Supplemental.pdf [file NIHMS847074-supplement-Supplemental.pdf]

Electronic Supplementary Material

Cintron D, Lipford M, Larrea Mantilla L, Spencer-Bonilla G, Lloyd R, Gionfriddo MR, Gunjal S, Farrell AM, Miller V, Murad MH. The Efficacy of Menopausal Hormone Therapy on Sleep Quality: Systematic Review and Meta-analysis.

**eAppendix 1** Search Strategy October 5, 2015.

**eTable 1** Summary of trial and population characteristics of eligible 42 randomized clinical trials

**eTable 2** Risk of Bias of individual studies

**eFig.1** Forest plot for subgroup based on risk of bias

**eFig.2** Forest plot for subgroup based on intervention length

**eTable 3** Classification by sleep specialists of scales with at least one sleep item into any of the applicable seven domains of sleep quality assessed by the Pittsburgh Sleep Quality Index

The supplementary material has been provided by the authors to give readers additional information about their work.

**eAppendix 1.** Search strategy October 5, 2015.

| Database                    | Number of References | After de-duplication |
|-----------------------------|----------------------|----------------------|
| Ovid MEDLINE                | 113                  | 113                  |
| Ovid Embase                 | 221                  | 141                  |
| Ovid PsychInfo              | 125                  | 112                  |
| Scopus                      | 189                  | 56                   |
| Ovid Cochrane EBM & Central | 67                   | 2                    |
| <b>Total</b>                | <b>--</b>            | <b>424</b>           |

**MEDLINE: 113**

1. menopause/ or menopause, premature/ or perimenopause/ or postmenopause/ or ((change adj life) or menopau\* or perimenopau\* or postmenopau\* or peri-menopau\* or post-menopau\*).tw
2. ("Estrogens, Conjugated (USP)"/ or Estrogen Replacement Therapy/ or (estradiol\* or estriol or 17-beta-estradiol or estrogen\* or oestrogen or progestin or estroprogestin\* or premarin or oestrogen\* or climopax or carentil or oestro-feminal or estrogen-feminal or prelestrin or transannon or femavit or climarest or presomen or progens or oestrofeminal or estrofeminal or dagynil or cenestin or bazedoxifene or hydroxyestradiol or estrogel or estrema or estratab or estrapatch or estradot or divigel or Estraderm or estrace or estrasorb or estergon or oestradiol or oestrodose or oestroform or oestrogel or sandrena or vagifem or valergen or vivelle).tw
3. Exp sleep or exp sleep disorders or (Sleep\* or insomnia\* or dyssomnia\* or parasomnia\* or (early adj awake\*).tw
4. 1 and 2 and 3
5. Remove duplicates from 4
6. Limit 5 to 2000
7. Limit 6 to randomized controlled trials
8. 6 and (double-blind method/ or (randomi\* or blind\* or mask\*2).tw)
9. 7 or 8

**Embase: 141**

1. "menopause and climacterium"/ or climacterium/ or early menopause/ or menopause/ or postmenopause/ or ((change adj life) or menopau\* or perimenopau\* or postmenopau\* or peri-menopau\* or post-menopau\*).tw
2. Exp conjugated estrogen derivative/ or exp conjugated estrogen/ or estrogen therapy/ or (estradiol\* or estriol or 17-beta-estradiol or estrogen\* or progestin or oestrogen or estroprogestin\* or premarin or oestrogen\* or climopax or carentil or oestro-feminal or estrogen-feminal or prelestrin or transannon or femavit or climarest or presomen or progens or oestrofeminal or estrofeminal or dagynil or cenestin or bazedoxifene or hydroxyestradiol or estrogel or estrema or estratab or estrapatch or estradot or divigel or Estraderm or estrace or estrasorb or estergon or oestradiol or oestrodose or oestroform or oestrogel or sandrena or vagifem or valergen or vivelle).tw
3. Exp sleep/ or exp sleep disorder/ or (Sleep\* or insomnia\* or dyssomnia\* or parasomnia\* or early adj awake\*).tw
4. 1 and 2 and 3
5. Remove duplicates from 4
6. Limit 5 to 2000
7. Limit 6 to randomized controlled trials
8. 6 and (double-blind method/ or (randomi\* or blind\* or mask\*2).tw)
9. 7 or 8

**Ovid PsychInfo: 112**

Database: PsycINFO<1987 to September Week 5 2015> Search Strategy:

- 
1. menopause/ or ((change adj life) or menopau\* or perimenopau\* or postmenopau\* or peri-menopau\* or post-menopau\*).tw.
  2. estrogens/ or estradiol/ or estrone/

3. estrogens/ or estradiol/ or estrone/ or (estradiol\* or estriol or 17-beta-estradiol or estrogen\* or progestin or oestrogen or estropogest\* or premarin or oestrogen\* or climopax or carentil or oestro-feminal or estro-feminal or prelestrin or transannon or femavit or climarest or presomen or progens or oestrofeminal or estrofeminal or dagynil or cenestin or bazedoxifene or hydroxyestradiol or estrogen or estrema or estratab or estrapatch or estradot or divigel or Estraderm or estrace or estrasorb or estergon or oestradiol or oestrodose or oestroform or oestrogen or sandrena or vagifem or valergen or vivelle).tw.
4. 1 and 2 and 3
5. remove duplicates from 4
6. limit 5 to yr="2000 - 2016"
7. 6 and (randomi\* or blind\* or mask\*2).tw.

**Scopus: 56**

(( TITLE-ABS-KEY (menopau\* OR perimenopau\* OR postmenopau\* OR peri-menopau\* OR post-menopau\*)) AND ( TITLE-ABS-KEY (estradiol\* OR estriol OR 17-beta-estradiol or estrogen\* OR oestrogen OR progestin OR estropogest\* OR premarin OR oestrogen\* OR climopax OR carentil OR oestro-feminal OR estro-feminal OR prelestrin OR transannon OR femavit OR climarest OR presomen OR progens OR oestrofeminal OR estrofeminal OR dagynil OR cenestin OR bazedoxifene OR hydroxyestradiol OR estrogen OR estrema OR estratab OR estrapatch OR estradot OR divigel OR estraderm OR estrace OR estrasorb OR estergon OR oestradiol OR oestrodose OR oestroform OR oestrogen OR sandrena OR vagifem OR valergen OR vivelle)) AND ( TITLE-ABS-KEY (sleep\* OR insomnia\* OR dyssomnia\* OR parasomnia\* OR (early W/1 awake\*))) AND ( TITLE-ABS-KEY (randomi\* OR blind\* OR mask\*)) AND ( LIMIT-TO ( PUBYEAR, 2015 ) OR LIMIT-TO ( PUBYEAR, 2014 ) OR LIMIT-TO ( PUBYEAR, 2013 ) OR LIMIT-TO ( PUBYEAR, 2012 ) OR LIMIT-TO ( PUBYEAR, 2011 ) OR LIMIT-TO ( PUBYEAR, 2010 ) OR LIMIT-TO ( PUBYEAR, 2009 ) OR LIMIT-TO ( PUBYEAR, 2008 ) OR LIMIT-TO ( PUBYEAR, 2007 ) OR LIMIT-TO ( PUBYEAR, 2006 ) OR LIMIT-TO ( PUBYEAR, 2005 ) OR LIMIT-TO ( PUBYEAR, 2004 ) OR LIMIT-TO ( PUBYEAR, 2003 ) OR LIMIT-TO ( PUBYEAR, 2002 ) OR LIMIT-TO ( PUBYEAR, 2001 ) OR LIMIT-TO ( PUBYEAR, 2000 ))

**Ovid Cochrane EBM & Central: 2**

EBM Reviews - Cochrane Database of Systematic Reviews <2005 to August 2015>, EBM Reviews - ACP Journal Club <1991 to September 2015>, EBM Reviews - Database of Abstracts of Reviews of Effects <2nd Quarter 2015>, EBM Reviews - Cochrane Central Register of Controlled Trials <August 2015>, EBM Reviews - Cochrane Methodology Register <3rd Quarter 2012>, EBM Reviews - Health Technology Assessment <3rd Quarter 2015>, 2012>EBM Reviews - NHS Economic Evaluation Database <2nd Quarter 2015>

Search Strategy:

- 
1. ((change adj life) or menopau\* or perimenopau\* or postmenopau\* or peri-menopau\* or post-menopau\*).ti,ab. (13556)
  2. (estradiol\* or estriol or 17-beta-estradiol or estrogen\* or oestrogen or progestin or estropogest\* or premarin or oestrogen\* or climopax or carentil or oestro-feminal or estro-feminal or prelestrin or transannon or femavit or climarest or presomen or progens or oestrofeminal or estrofeminal or dagynil or cenestin or bazedoxifene or hydroxyestradiol or estrogen or estrema or estratab or estrapatch or estradot or divigel or Estraderm or estrace or estrasorb or estergon or oestradiol or oestrodose or oestroform or oestrogen or sandrena or vagifem or valergen or vivelle).ti,ab. (7469)
  3. (Sleep\* or insomnia\* or dyssomnia\* or parasomnia\* or (early adj awake\*)).ti,ab. (16372)  
1 and 2 and 3 (104)
  4. limit 4 to yr="2000 - 2015" [Limit not valid in DARE; records were retained] (88)
  5. remove duplicates from 5 (84)
  6. (randomi\* or blind\* or mask\*2).ti,ab. (430705)
  7. 6 and 7 (67)

| <b>eTable 1.</b> Summary of trial and population characteristics of eligible 42 randomized clinical trials |                |                                                  |                                                          |                                                                                        |                                |                                        |                            |                                        |                                           |
|------------------------------------------------------------------------------------------------------------|----------------|--------------------------------------------------|----------------------------------------------------------|----------------------------------------------------------------------------------------|--------------------------------|----------------------------------------|----------------------------|----------------------------------------|-------------------------------------------|
| <b>Reference</b>                                                                                           | <b>Country</b> | <b>Comparison/<br/>Sample Size<br/>[Acronym]</b> | <b>Menopause<br/>Definition</b>                          | <b>Race<br/>[n(%)]</b>                                                                 | <b>Inclusion<br/>Criteria</b>  | <b>Type MHT,<br/>Dose<br/>(mg/day)</b> | <b>Duratio<br/>n (wks)</b> | <b>Assessment of<br/>Sleep Quality</b> | <b>Reported<br/>Effect on<br/>Sleep</b>   |
| Barnabei et al.,2002 <sup>1</sup>                                                                          | USA            | Placebo/ 2763 [HERS]                             | LMP > 5 years + FSH > 40 mIU/ml Or BO                    | W 2451(88)<br>B 218 (7.8)<br>O 94 (3.4)                                                | Coronary artery disease        | o-CEE 0.625 + MDP 2.5                  | 208                        | MSQ                                    | Benefit                                   |
| Shulman et al., 2002 <sup>2</sup>                                                                          | USA            | Parallel/626                                     | LMP > 12 m Or 6 m >LMP>12 m + E2<20 pg/mL+ FSH>40 mIU/mL | W 575(91)<br>B 30 (4.8)<br>H 22 (3.5)<br>A 6 (0.009)<br>O 3 (0.005)                    | Moderate to severe hot flushes | o-E2 0.045 + levonorgestrel 0.015      | 52                         | WHQ                                    | Benefit, equal                            |
|                                                                                                            |                |                                                  |                                                          |                                                                                        |                                | o-E2 0.045 + levonorgestrel 0.03       |                            |                                        |                                           |
|                                                                                                            |                |                                                  |                                                          |                                                                                        |                                | o-E2 0.045 + levonorgestrel 0.04       |                            |                                        |                                           |
| Hays et al., 2003 <sup>3</sup>                                                                             | USA            | Placebo/16008 [WHI]                              | 50-54 y/o+ LMP >12 m >54 y/o + LMP >6 m                  | W 13945(87)<br>B 1124 (7.0)<br>H 888(5.5)<br>A 363 (2.2)<br>I 56(0.003)<br>U 232 (1.4) |                                | o-CEE 0.625 + MDP 2.5                  | 156                        | WHIIRS                                 | Benefit, small not clinically significant |
|                                                                                                            |                |                                                  |                                                          |                                                                                        |                                |                                        |                            | RAND-SF 36                             | NR                                        |
| Gelfand et al.,2003 <sup>4</sup>                                                                           | Canada         | Placebo/ 119                                     | LMP > 6 m                                                | W 115 (97)<br>B 1(0.008)<br>A 2 (1.7)<br>O 1(0.008)                                    | VMS                            | o-E2 1+ Norgestimate 0.09              | 12                         | KI                                     | NR                                        |
| Saletu-Zyhlarz et al., 2003 <sup>5</sup>                                                                   | Austria        | Placebo/ 55 +                                    | LMP > 24 m + E<55 pg/mL+ FSH>19 mIU/mL + KI >15          | NR                                                                                     | Insomnia + VMS                 | o-EV 2 + dienogest 3 (Climodien)       | 8                          | PSQI                                   | Benefit, higher Climodien                 |
|                                                                                                            |                |                                                  |                                                          |                                                                                        |                                |                                        |                            | SSA Sleep Quality                      | Benefit, equal                            |
|                                                                                                            |                |                                                  |                                                          |                                                                                        |                                |                                        |                            | SSA Awakening                          | No benefit                                |
|                                                                                                            |                |                                                  |                                                          |                                                                                        |                                |                                        |                            | SSA Somatic Complaints                 | No Benefit                                |
|                                                                                                            |                |                                                  |                                                          |                                                                                        |                                |                                        |                            | SSA Total Score                        | Benefit, higher                           |

|                                          |                      |                         |                                                           |                                              |                                |                                |                |                      |                |
|------------------------------------------|----------------------|-------------------------|-----------------------------------------------------------|----------------------------------------------|--------------------------------|--------------------------------|----------------|----------------------|----------------|
|                                          |                      |                         |                                                           |                                              |                                |                                |                |                      | Climodien      |
| Sherman et al., 2003 <sup>6</sup>        | USA                  | Placebo/246 [ERA trial] | >55 y/o + LMP >5 years                                    | W 208 (83)                                   | Coronary Artery Disease        | o-CEE 0.625                    | 156            | WHIIRS RAND 36       | No Benefit     |
|                                          |                      |                         |                                                           |                                              |                                | o-CEE 0.625 +MPA 2.5           |                |                      |                |
| Morrison et al., 2004 <sup>7</sup>       | USA                  | Placebo/ 57             | LMP > 1 year with FSH >40 mIU/mL if <5 years of menopause | W 25(44)<br>B 27 (47)<br>H 1(1.7)<br>O 4 (7) | Depression                     | t-E2 0.01 + o-MDP 10           | 8              | WHQ                  | NR             |
| Rudolph et al., 2004 <sup>8</sup>        | Germany              | Placebo/ 129            | ICD-10: N95.1                                             | NR                                           | Depression                     | o-EV 2 + dienogest 2           | 24             | WHQ                  | Benefit        |
| Schurmann et al., 2004 <sup>9</sup>      | Germany, Netherlands | Placebo/ 225            | E < 20 pg/mL + FSH > 50 U/L                               | NR                                           | >5 Moderate severe hot flushes | o-Estradiol 1 + Drospirenone 1 | 16             | SleepDailyDiary Card | Benefit, equal |
|                                          |                      |                         |                                                           |                                              |                                | o-Estradiol 1 + Drospirenone 2 |                |                      |                |
|                                          |                      |                         |                                                           |                                              |                                | o-Estradiol 1 + Drospirenone 3 |                |                      |                |
| Dayal et al., 2005 <sup>10</sup>         | USA                  | Placebo / 50            | LMP >12 m or LMP >6 m+ FSH 40 mIU/mL                      | NR                                           |                                | DHEA 50                        | 12             | WHQ                  | No Benefit     |
|                                          |                      |                         |                                                           |                                              |                                | o-CEE 0.625                    |                |                      |                |
|                                          |                      |                         |                                                           |                                              |                                | o-CEE 0.625 + DHEA 50          |                |                      |                |
| Drapier-Faure et al., 2005 <sup>11</sup> | France               | Parallel/ 143           | LMP or receiving MHT > 2 years                            | NR                                           |                                | EV 2 + Dienogest 2             | 52             | WHQ                  | Benefit        |
|                                          |                      |                         |                                                           |                                              |                                | EV 2+ CA 1 (cyclical)          |                |                      | No Benefit     |
| Levine et al., 2005 <sup>12</sup>        | USA                  | Parallel / 624 +        | LMP >1 year + FSH > 40 mIU/mL+ E <20 pg/mL                | NR                                           |                                | t-E2 0.05                      | 52             | WHIIRS               | Benefit, equal |
|                                          |                      |                         |                                                           |                                              |                                | t-E2 0.05 + NA 0.14            |                |                      |                |
|                                          |                      |                         |                                                           |                                              |                                | t-E2 0.05 + NA 0.25            |                |                      |                |
|                                          |                      |                         |                                                           |                                              |                                | t-E2 0.05 + NA 0.40            |                |                      |                |
|                                          |                      | Placebo / 226 +         | NR                                                        |                                              | 12                             | WHIIRS                         | Benefit, equal |                      |                |
|                                          |                      |                         |                                                           |                                              |                                | t-E2 0.05 + NA 0.25            |                |                      |                |

|                                        |                                                                                                                                            |                              |                                                               |                                                             |                                                |                                  |    |                                                                              |                   |
|----------------------------------------|--------------------------------------------------------------------------------------------------------------------------------------------|------------------------------|---------------------------------------------------------------|-------------------------------------------------------------|------------------------------------------------|----------------------------------|----|------------------------------------------------------------------------------|-------------------|
|                                        |                                                                                                                                            |                              |                                                               |                                                             |                                                | t-E2 0.05 +<br>NA 0.40           |    |                                                                              |                   |
| Elfituri et al.,<br>2005 <sup>13</sup> | Libya                                                                                                                                      | Parallel/100                 | LMP > 12 m<br>or >3 m after<br>BO                             | NR                                                          |                                                | Tibolone 2.5                     | 52 | Author<br>Developed<br>Menopause 10<br>symptoms<br>Questionnaire             | Benefit           |
|                                        |                                                                                                                                            |                              |                                                               |                                                             |                                                | o-E2 2 +<br>dydrogesterone<br>10 |    |                                                                              | Benefit           |
| Heinrich et al.,<br>2005 <sup>14</sup> | Germany                                                                                                                                    | Placebo/ 51                  | Hysterectomy                                                  | NR                                                          | hysterecto<br>mized                            | EV 2                             | 24 | ADSK Sleep<br>item + Sleep<br>item from<br>Menopausal<br>Index<br>(combined) | No benefit        |
|                                        |                                                                                                                                            |                              |                                                               |                                                             |                                                | EV 2 + mP<br>100                 |    |                                                                              |                   |
| Haines et al.,<br>2005 <sup>15</sup>   | China,<br>Hong<br>Kong,<br>Indonesia,<br>Korea,<br>Malaysia,<br>Pakistan,<br>Philippines,<br>Singapore,<br>Taiwan,<br>Thailand,<br>Vietnam | Placebo/ 1028<br>[PAM study] | LMP > 12 m                                                    | A 1028(100)                                                 | Menopaus<br>al<br>symptoms<br>including<br>VMS | o-CEE 0.625 +<br>MDP 2.5         | 24 | Sleep Daily<br>Diary Card                                                    | Benefit,<br>equal |
|                                        |                                                                                                                                            |                              |                                                               |                                                             |                                                | o-CEE 0.45 +<br>MDP 1.5          |    |                                                                              |                   |
|                                        |                                                                                                                                            |                              |                                                               |                                                             |                                                | o-CEE 0.30 +<br>MDP 1.5          |    |                                                                              |                   |
| Diem et al.,<br>2006 <sup>16</sup>     | USA                                                                                                                                        | Placebo/ 417<br>[ULTRA]      | -                                                             | W 385(92)                                                   |                                                | t-E2 0.014                       | 96 | Six point Likert<br>Scale                                                    | Benefit           |
| Joffe et al.,<br>2006 <sup>17</sup>    | USA                                                                                                                                        | Placebo / 52                 | STRAW<br>criteria                                             | W 46(88)<br>B 3(0.6)<br>H 1(0.02)<br>A 1(0.02)<br>O 1(0.02) | Severe to<br>moderate<br>hot<br>flushes        | t-E2 0.05                        | 12 | PSQI                                                                         | Benefit           |
| Reddy et al.,<br>2006 <sup>18</sup>    | USA                                                                                                                                        | Placebo/ 60                  | LMP > 6 m<br>or<br>>12 m after<br>BO or<br>FSH > 30<br>mIU/mL | NR                                                          | Moderate<br>to severe<br>hot<br>flushes        | o-CEE 0.625                      | 12 | GCS                                                                          | NR                |
| Serrano et al.,<br>2006 <sup>19</sup>  | Italy                                                                                                                                      | Parallel/ 226                | LMP > 6 m +<br>FSH >40 U/L                                    | NR                                                          |                                                | o-CEE 0.625 +<br>MPA 10          | 52 | MQoL                                                                         | NR                |

|                                         |                                                                                                    |                          |                                                                                 |                                                 |                                         |                                 |    |                            |                                                       |
|-----------------------------------------|----------------------------------------------------------------------------------------------------|--------------------------|---------------------------------------------------------------------------------|-------------------------------------------------|-----------------------------------------|---------------------------------|----|----------------------------|-------------------------------------------------------|
|                                         |                                                                                                    |                          |                                                                                 |                                                 |                                         | t-E2 0.05 +<br>MPA 10           |    |                            |                                                       |
| LeBlanc et al.,<br>2007 <sup>20</sup>   | USA                                                                                                | Placebo/<br>37           | 6 m >LMP <<br>36 m +<br>FSH>920<br>IU/L                                         | NR                                              |                                         | EV 2 + MDP 5                    | 8  | OHSU SL Sleep<br>Diary     | No Benefit                                            |
| Maki et al.,<br>2007 <sup>21</sup>      | USA                                                                                                | Placebo/ 180<br>[COGENT] | LMP > 12-36<br>m or 6>LMP<br>>12 m + FSH<br>< lower limit<br>for PMW            | W 147(82)<br>B 17(9.4)<br>H 11(6.1)<br>A 2(1.1) | Cognitive<br>complaint                  | o-CEE 0.625 +<br>MDP 2.5        | 16 | PSQI                       | Small<br>benefit,<br>data not<br>shown                |
|                                         |                                                                                                    |                          |                                                                                 |                                                 |                                         |                                 |    | GCS                        | NR                                                    |
| Pitkin et al.,<br>2007 <sup>22</sup>    | Finland,<br>Sweden,<br>Denmark,<br>Germany,<br>Poland,<br>Czech<br>Republic,<br>Hungary,<br>Russia | Parallel/ 459            | LMP> 12-36<br>m or<br>>6 m after<br>BO                                          | NR                                              | Moderate<br>to severe<br>hot<br>flushes | EV 1 + MDP<br>2.5               | 52 | WHQ                        | Benefit,<br>equal                                     |
|                                         |                                                                                                    |                          |                                                                                 |                                                 |                                         | EV 1 + MDP 5                    |    |                            |                                                       |
|                                         |                                                                                                    |                          |                                                                                 |                                                 |                                         | EV 2 + MDP 5                    |    |                            |                                                       |
| Hachul et al.,<br>2008 <sup>23</sup>    | Brazil                                                                                             | Placebo/ 33<br>+         | LMP > 1 year<br>+ FSH >30<br>mIU/mL                                             | NR                                              |                                         | o-CEE 0.625 +<br>MDP 2.5        | 24 | KI                         | NR                                                    |
|                                         |                                                                                                    |                          |                                                                                 |                                                 |                                         |                                 |    | ESS                        | No benefit                                            |
| Kalleinen et al.,<br>2008 <sup>24</sup> | Finland                                                                                            | Placebo/ 18<br>+         | By age and<br>amenorrhea<br>(no further<br>details)                             | NR                                              |                                         | EV 2 +<br>Norethisterone<br>0.7 | 24 | BNSQ                       | No Benefit,<br>unfavorable                            |
| Honjo et al.,<br>2009 <sup>25</sup>     | Japan                                                                                              | Placebo/<br>211          | LMP >1 year<br>+ FSH > 30<br>mIU/mL , E2<br><20 pg/mL<br>or<br>>1 m after<br>BO | A 211(100)                                      | Moderate<br>to Severe<br>Hot<br>flushes | mE2 0.5                         | 8  | Self-report sleep<br>scale | Benefit,<br>greater and<br>earlier for<br>higher dose |
|                                         |                                                                                                    |                          |                                                                                 |                                                 |                                         | mE2 1.0                         |    |                            |                                                       |
| Baksu et al.,<br>2009 <sup>26</sup>     | Turkey                                                                                             | No treatment /<br>132    | Surgically<br>menopausal                                                        | NR                                              |                                         | o-CEE 0.625                     | 52 | KI                         | Benefit                                               |
| Padua et al.,<br>2010 <sup>27</sup>     | Brazil                                                                                             | Placebo/ 50              | LMP > 12 m<br>+ FSH >35<br>IU/L                                                 | H 50 (100)                                      | Chronic<br>Hepatitis<br>C               | t-E2 0.05 + o-<br>NA 0.17       | 36 | KI                         | No Benefit                                            |

|                                              |        |                         |                                                               |                                                         |                                |                                            |     |                     |                                               |
|----------------------------------------------|--------|-------------------------|---------------------------------------------------------------|---------------------------------------------------------|--------------------------------|--------------------------------------------|-----|---------------------|-----------------------------------------------|
| Joffe et al., 2011 <sup>28</sup>             | USA    | Placebo/ 41 +           | STRAW criteria                                                | W 26(63)<br>B 13(32)<br>O 2(0.05)                       | Unipolar depression + insomnia | t-E2 0.5                                   | 8   | PSQI                | NR                                            |
| Lin et al., 2011 <sup>29</sup>               | China  | Placebo/ 244            | LMP > 1 year or >6 wks after BO or LMP > 6 m + FSH >40 mIU/mL | A 244(100)                                              | Moderate to severe VMS         | o-E2 1 + Drospirenone 2                    | 18  | Symptom Diary Cards | No Benefit                                    |
| Sanchez-Rodriguez et al., 2013 <sup>30</sup> | Mexico | Placebo/ 111            | -                                                             | H 111(100)                                              |                                | o-CEE 0.625 + MPA 5                        | 24  | WHOQoL, Brief       | NR                                            |
| Polisseni et al., 2013 <sup>31</sup>         | Brazil | Parallel/ 86            | -                                                             | W 48(56)<br>O 38(44)                                    | Moderate to severe hot flushes | o- Tiboline 2.5<br>o-oestradiol 1 + NA 0.5 | 12  | WHQ                 | Benefit, equal                                |
| Caglayan et al., 2014 <sup>32</sup>          | Turkey | Parallel/ 73            | -                                                             | NR                                                      |                                | EV 2 + Dienogest 2<br>EV 2 + Dienogest 10  | 24  | KI                  | NR                                            |
| Abraham et al., 2014 <sup>33*</sup>          | USA    | Placebo/ 3544 [SMART 1] | LMP ≥12 +FSH > 30 mIU /mL+E<183 pmol/L                        | W 2878 (81)<br>B 482(13.6)<br>H 135 (3.8)<br>O 25 (0.7) |                                | o-CEE 0.45 +BZA 10                         | 104 | MQoL<br>Sleep diary | NR                                            |
|                                              |        |                         |                                                               |                                                         |                                | o-CEE 0.45 +BZA 20                         |     |                     | Benefit, irrespective of years from menopause |
|                                              |        |                         |                                                               |                                                         |                                | o-CEE 0.45+BZA 40                          |     |                     | NR                                            |
|                                              |        |                         |                                                               |                                                         |                                | o-CEE 0.625+BZA 10                         |     |                     | NR                                            |
|                                              |        |                         |                                                               |                                                         |                                | o-CEE 0.625+BZA 20                         |     |                     | Benefit, irrespective of years from menopause |



|                                                       |         |                           |                                                                                                  |                                                  |                                                                   |                                                                         |     |                                        |                                                                                |
|-------------------------------------------------------|---------|---------------------------|--------------------------------------------------------------------------------------------------|--------------------------------------------------|-------------------------------------------------------------------|-------------------------------------------------------------------------|-----|----------------------------------------|--------------------------------------------------------------------------------|
|                                                       |         |                           |                                                                                                  |                                                  |                                                                   | o-CEE<br>0.625+BZA 40                                                   |     |                                        | NR                                                                             |
|                                                       |         | Placebo/332<br>[SMART 2]  | LMP $\geq$ 12 m<br>or LMP>6 m<br>+ FSH>40<br>mIU/mL                                              | W 271(85)<br>B 34(11)<br>H 18(5.6)<br>O 10 (3.1) | Severe hot<br>flushes                                             | o-CEE<br>0.45+BZA 20<br>o-CEE<br>0.625+BZA 20                           | 12  | MQoL<br><br>MOS                        | Benefit,<br>equal<br>irrespective<br>of years<br>from<br>menopause             |
|                                                       |         | Placebo/575<br>[SMART 3]  |                                                                                                  | W 496(86)<br>B 19(3.3)<br>H 33(5.7)<br>O 27(4.7) | Vulvar<br>vaginal<br>atrophy<br>moderate<br>to severe<br>symptoms | o-CEE<br>0.45+BZA 20<br>o-CEE<br>0.625+BZA 20                           | 12  | MQoL                                   | NR                                                                             |
|                                                       |         | Placebo/1613<br>[SMART 5] |                                                                                                  | W 1451(89)<br>B 109(6.7)<br>O 53(3.3)            |                                                                   | o-CEE<br>0.45+BZA 20<br>o-CEE<br>0.625+BZA 20<br>o-CEE 0.45<br>+MPA 1.5 | 52  | MOS<br>MQoL                            | Benefit in<br>subgroup<br>VMS+<br>sleep<br>problems                            |
| Savolainen-<br>Peltonen et al.,<br>2014 <sup>34</sup> | Finland | Placebo/ 107              | 6 m ><br>LMP>36 m+<br>FSH>30 U/L                                                                 | NR                                               | ½ women<br>with<br>severe<br>VMS, ½<br>symptom<br>free            | o- E2 2<br>o-E2 2+ MPA<br>5                                             | 24  | WHQ                                    | Benefit, for<br>women<br>with VMS<br>No benefit<br>for women<br>without<br>VMS |
| Toffol et al.,<br>2014 <sup>35</sup>                  | Finland | Placebo / 18              | $\geq$ 58 y/ o +<br>LMP > 1 year                                                                 | NR                                               |                                                                   | o-EV 2 + NA<br>0.07                                                     | 24  | BNSQ<br>Preceding night<br>sleep score | NR                                                                             |
| Ensrud et al.,<br>2015 <sup>36</sup>                  | USA     | Placebo/ 243<br>[MsFLASH] | LMP $\geq$ 60<br>days<br>LMP $\geq$ 12 m<br>or BO<br>Or FSH >20<br>mIU/mL + E<br>$\leq$ 50 pg/mL | W 150(62)<br>B 78(32)<br>O 15(6.2)               | Severe<br>VMS                                                     | o-E2 0.5                                                                | 8   | PSQI                                   | Modest<br>Benefit                                                              |
| Kling et al.,<br>2015 <sup>37</sup>                   | USA     | Placebo/ 95<br>[KEEPS]    | 6 m >LMP <<br>36 m + FSH                                                                         | NR                                               |                                                                   | o-CEE 0.45 +<br>P 200                                                   | 192 | MSQ                                    | No Benefit                                                                     |

|                                               |          |                  |                                      |    |          |                      |   |            |            |
|-----------------------------------------------|----------|------------------|--------------------------------------|----|----------|----------------------|---|------------|------------|
|                                               |          |                  | $\geq 35$ mIU/mL<br>+ E <40<br>pg/mL |    |          | t-E2 0.05 + P<br>200 |   |            |            |
| Tansupwatdiku<br>l et al., 2015 <sup>38</sup> | Thailand | Placebo/ 40<br>+ | LMP > 1 year<br>or<br>BO             | NR | insomnia | t-E2 0.005           | 8 | ISI<br>ESS | No benefit |

Summary of eligible 42 randomized clinical trials organized by year of publication.\* For SMART trials data extraction, a total of 16 publications were found, given multiple reports for a single trial. Abbreviations: BO= bilateral oophorectomy ; +: Primary outcome was sleep quality or insomnia ; NR: Not reported; W, white; B, black; H, Hispanic; A, Asian; I, Native Indian; O, other; U, unclear or unknown; MQoL: Menopause Quality of Life Questionnaire, MOS: Medical Outcomes Sleep Scale, KI: Kupperman Index; MSQ: Menopausal Symptom Questionnaire; WHIIRS: Women’s Health Initiative Insomnia Rating Scale; RAND-SF 36: RAND Short Form 36 Item Health Survey; PSQI: Pittsburgh Sleep Quality Index ; ESS: Epworth Sleepiness Scale; ADS-K: German version of Center for Epidemiological Studies Depression Scale, authors used only sleep item for sleep quality assessment; BNSQ : Basic Nordic Sleep Questionnaire ; OHSU SL: Oregon Health and Science University Sleep Laboratory ; GCS: Green Climacteric Scale; WHQ : Women’s Health Questionnaire; SSA: Self-Assessment of Sleep and Awakening Quality Scale; WHOQoL: World Health Organization Quality of Life Brief Questionnaire; ISI: Insomnia Severity Index; CEE: conjugated equine estrogen; BZA: bazedoxifene; MPA : medroxyprogesterone acetate; EV: estradiol valerate ; DHEA: Dehydroepiandrosterone; E2:17 beta estradiol; CA : Crypterone Acetate; mP: micronized-progesterone; mE2:micronized 17b beta estradiol ; P: Progesterone; NA: Norethidrone Acetate; L: levonorgestrel; PMW : post-menopausal women.

**eTable 2.** Cochrane Risk of Bias Quality Assessment

| <b>Reference</b>                 | <b>SG</b> | <b>AC</b> | <b>BP</b> | <b>BOA</b> | <b>IOD</b> | <b>SOR</b> | <b>Other</b> | <b>Overall</b> |
|----------------------------------|-----------|-----------|-----------|------------|------------|------------|--------------|----------------|
| Barnabei et al,2002              | Low       | Low       | Low       | Low        | Low        | Unclear    | High         | Mod            |
| Schulman et al., 2002            | Low       | Low       | High      | Low        | Low        | Unclear    | Unclear      | High           |
| Hays et al., 2003                | Unclear   | High      | Low       | Unclear    | Unclear    | Unclear    | High         | High           |
| Gelfand et al.,2013              | Low       | Low       | Low       | Unclear    | High       | Unclear    | High         | Mod            |
| Saletu-Zyhlarz et al., 2003      | Unclear   | Unclear   | Low       | Unclear    | Unclear    | Unclear    | High         | Mod            |
| Sherman et al., 2003             | Low       | Unclear   | Low       | Low        | Unclear    | Low        | Unclear      | Mod            |
| Morrison et al., 2004            | Low       | Unclear   | High      | High       | Low        | High       | Low          | High           |
| Rudolph et al., 2004             | Low       | Low       | Low       | Unclear    | High       | Unclear    | High         | Mod            |
| Schurmann et al., 2004           | Low       | Unclear   | Low       | Unclear    | Low        | Unclear    | High         | High           |
| Dayal et al., 2005               | Low       | Unclear   | Unclear   | Unclear    | Low        | Unclear    | Unclear      | High           |
| Drapier-Faure et al., 2005       | Unclear   | Unclear   | High      | Unclear    | High       | Unclear    | Unclear      | High           |
| Levine et al., 2005              | Unclear   | Unclear   | Low       | Unclear    | Low        | Low        | Unclear      | Mod            |
| Elfituri et al., 2005            | Unclear   | Unclear   | Unclear   | Unclear    | Low        | Unclear    | Unclear      | Mod            |
| Heinrich et al., 2005            | Unclear   | Unclear   | Unclear   | Unclear    | High       | Unclear    | Unclear      | High           |
| Haines et al., 2005              | Unclear   | Unclear   | Unclear   | Unclear    | High       | Unclear    | High         | High           |
| Diem et al., 2006                | Low       | Unclear   | Low       | Low        | Low        | Unclear    | High         | Mod            |
| Joffe et al., 2006               | Unclear   | Unclear   | Low       | Unclear    | Low        | High       | Low          | Mod            |
| Reddy et al., 2006               | Low       | Unclear   | Low       | Unclear    | Low        | Low        | High         | Mod            |
| Serrano et al., 2006             | Low       | Low       | High      | Low        | Low        | Unclear    | Unclear      | High           |
| LeBlanc et al., 2007             | High      | Unclear   | Low       | Unclear    | Low        | Unclear    | High         | High           |
| Maki et al., 2007                | Low       | Unclear   | Unclear   | Unclear    | High       | Unclear    | High         | High           |
| Pitkin et al., 2007              | Unclear   | Unclear   | Low       | Unclear    | Low        | High       | High         | Mod            |
| Hachul et al., 2008              | Unclear   | Unclear   | Low       | Unclear    | Low        | Unclear    | Low          | Mod            |
| Kalleinen et al., 2008           | Low       | Low       | Unclear   | Low        | Low        | Unclear    | High         | High           |
| Honjo et al., 2009               | Low       | Unclear   | Unclear   | Unclear    | Low        | Unclear    | High         | High           |
| Baksu et al., 2009               | Low       | Low       | Low       | Low        | Low        | Unclear    | Unclear      | Mod            |
| Padua et al., 2010               | Low       | Unclear   | Unclear   | Unclear    | Low        | Unclear    | Unclear      | High           |
| Joffe et al., 2011               | Unclear   | Unclear   | Low       | Unclear    | Low        | Unclear    | High         | Mod            |
| Lin et al., 2011                 | Low       | Unclear   | Low       | Unclear    | Low        | High       | Unclear      | Mod            |
| Sanchez-Rodriguez et al., 2013   | Low       | Unclear   | Unclear   | Unclear    | High       | Unclear    | Unclear      | Mod            |
| Polisseni et al., 2013           | Unclear   | Unclear   | Low       | Unclear    | Low        | Unclear    | Low          | Mod            |
| Caglayan et al., 2014            | Unclear   | Unclear   | Unclear   | Unclear    | Unclear    | Unclear    | Unclear      | High           |
| Abraham et al., 2014             | Low       | Unclear   | Unclear   | Unclear    | Low        | High       | High         | High           |
| Savolainen-Peltonen et al., 2014 | Low       | Low       | Low       | Unclear    | Low        | Unclear    | Low          | Mod            |
| Toffol et al., 2014              | Low       | Low       | Low       | Low        | Low        | Low        | High         | Mod            |

|                             |     |         |     |         |     |         |      |     |
|-----------------------------|-----|---------|-----|---------|-----|---------|------|-----|
| Ensrud et al., 2015         | Low | Unclear | Low | Unclear | Low | Low     | Low  | Mod |
| Kling et al., 2015          | Low | Unclear | Low | Unclear | Low | Unclear | High | Mod |
| Tansupwatdikul et al., 2015 | Low | Low     | Low | Low     | Low | Low     | Low  | Low |

Quality Assessment results from Cochrane Risk of Bias Tool. Abbreviations- SG: Sequence Generation, AC: Allocation Concealment, BP: Blinding of Participants, BOA: Blinding of Outcome Assessors, IOD: Incomplete Outcome Data, SOR : Selective Outcome Reporting.

**eFig1.** Standardized mean differences subgroup analyses based on risk of bias characteristic with moderate risk trials compared to high risk.

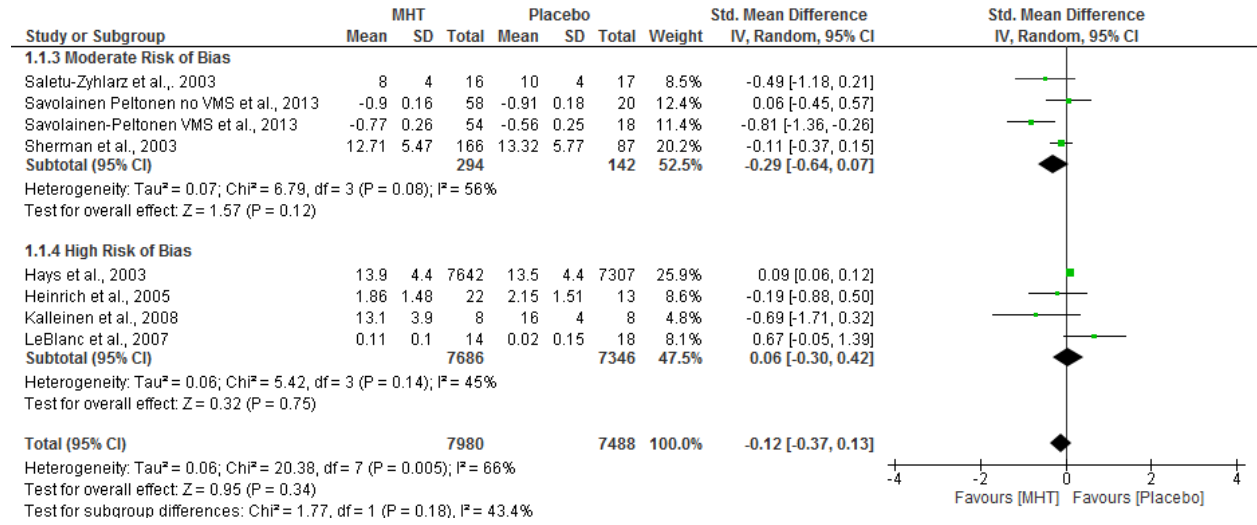

**eFig 2.** Standardized mean differences subgroup analyses based on length of intervention characteristics with trials with interventions longer than 8 weeks compared to 8 week trials

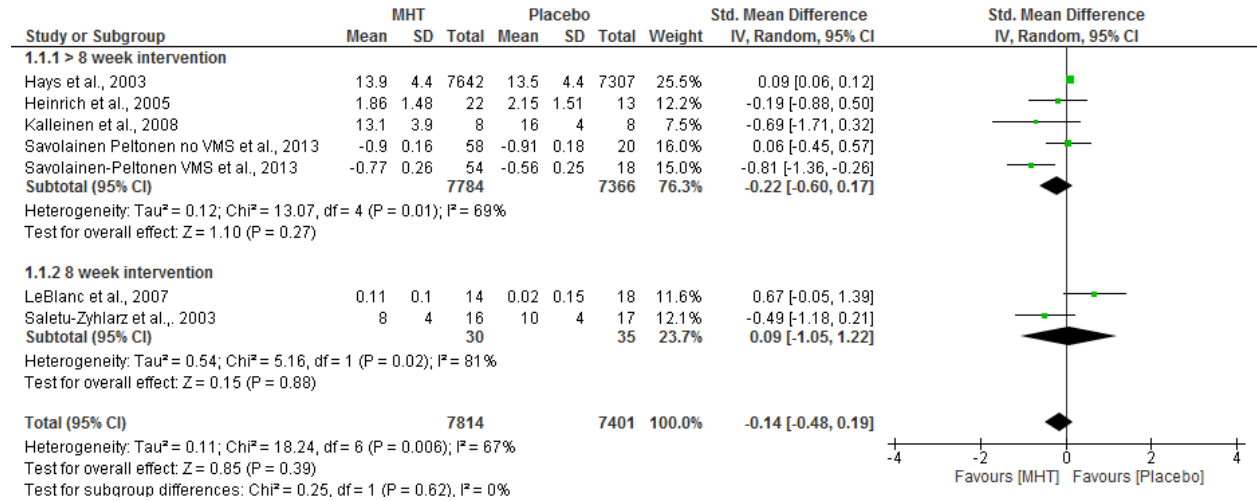

**eTable3.** Classification by sleep specialists of scales with at least one sleep item into any of the applicable seven domains of sleep quality assessed by the Pittsburgh Sleep Quality Index

| Scale                                                   | SQ | SL | SD | HSE | SD | DD | MU |
|---------------------------------------------------------|----|----|----|-----|----|----|----|
| PSQI                                                    | x  | x  | x  | x   | x  | x  | x  |
| Menopause Specific Quality of Life Questionnaire        |    |    |    |     | x  | x  |    |
| KI                                                      |    | x  |    |     | x  | x  |    |
| Menopausal Symptom 6 item Likert Scale                  |    | x  |    |     | x  | x  |    |
| WHQ                                                     |    | x  |    | x   | x  | x  |    |
| Daily Symptom Rating Calendar                           |    |    |    |     | x  | x  |    |
| 6 point likert scale                                    |    |    |    | x   | x  | x  |    |
| Selected Symptom List and scored like Green Climacteric |    | x  |    |     | x  | x  |    |
| ISI                                                     | x  | x  |    | x   |    | x  |    |
| Menopause Quality of Life Questionnaire                 |    |    |    | x   | x  | x  |    |
| ESS                                                     |    |    |    |     |    | x  |    |
| UNIFESP Sleep Questionnaire                             |    | x  |    |     | x  |    |    |
| Daily Diary cards                                       |    | x  |    |     | x  | x  |    |
| WHIIRS                                                  | x  | x  |    | x   | x  |    |    |
| CES-D Sleep item (included in sleep quality assessment) |    | x  |    |     |    |    |    |
| Patient Questionnaire                                   |    | x  |    |     | x  | x  |    |
| BNSQ                                                    | x  | x  | x  | x   | x  | x  | x  |
| Menopausal Symptom Questionnaire                        |    | x  |    |     | x  | x  |    |
| GCS                                                     |    | x  |    |     | x  | x  |    |
| Symptom Diary cards                                     | x  |    |    |     |    | x  |    |
| UQoL Scale                                              |    |    |    |     |    | x  |    |
| RAND 36                                                 |    |    |    |     |    | x  |    |
| 15-D Quality of Life Questionnaire                      | x  |    |    |     |    | x  |    |

|                                                                   |     |   |   |   |   |   |
|-------------------------------------------------------------------|-----|---|---|---|---|---|
| Visual Analogue Scale                                             |     |   |   |   | x | x |
| 100 mm visual analogue scale                                      | x   |   |   |   |   | x |
| Daily diary cards                                                 | x   |   |   |   |   | x |
| Medical Outcomes Sleep Scale                                      |     | x | x | x | x | x |
| WHO-QoL BREF                                                      | x   |   |   |   | x | x |
| Elfituri Independently developed Menopausal Symptom Questionnaire |     |   |   | x | x |   |
| Preceding Night Sleep Questionnaire                               | n/a |   |   |   |   |   |
| OHSU SL Sleep Diary                                               | n/a |   |   |   |   |   |
| SSA                                                               | n/a |   |   |   |   |   |

Abbreviations- SQ, Sleep quality; SL, Sleep latency; SD, Sleep Duration; HSE, Habitual Sleep Efficiency; SD, Sleep Disturbances; DD, Daytime Dysfunction; MU, Medication Use.

## Supplement References:

1. Barnabei VM, Grady D, Stovall DW, et al. Menopausal symptoms in older women and the effects of treatment with hormone therapy. *Obstet Gynecol* 2002;100:1209-18.
2. Shulman LP, Yankov V, Uhl K. Safety and efficacy of a continuous once-a-week 17beta-estradiol/levonorgestrel transdermal system and its effects on vasomotor symptoms and endometrial safety in postmenopausal women: the results of two multicenter, double-blind, randomized, controlled trials. *Menopause* 2002;9:195-207.
3. Hays J, Ockene JK, Brunner RL, et al. Effects of estrogen plus progestin on health-related quality of life. *N Engl J Med* 2003;348:1839-54.
4. Gelfand MM, Moreau M, Ayotte NJ, Hilditch JR, Wong BA, Lau CY. Clinical assessment and quality of life of postmenopausal women treated with a new intermittent progestogen combination hormone replacement therapy: a placebo-controlled study. *Menopause* 2003;10:29-36.
5. Saletu-Zyhlarz G, Anderer P, Gruber G, et al. Insomnia related to postmenopausal syndrome and hormone replacement therapy: sleep laboratory studies on baseline differences between patients and controls and double-blind, placebo-controlled investigations on the effects of a novel estrogen-progestogen combination (Climodien, Lafamme) versus estrogen alone. *J Sleep Res* 2003;12:239-54.
6. Sherman AM, Shumaker SA, Sharp P, et al. No effect of HRT on health-related quality of life in postmenopausal women with heart disease. *Minerva Ginecol* 2003;55:511-7.
7. Morrison MF, Kallan MJ, Ten Have T, Katz I, Tweedy K, Battistini M. Lack of efficacy of estradiol for depression in postmenopausal women: a randomized, controlled trial. *Biol Psychiatry* 2004;55:406-12.
8. Rudolph I, Palombo-Kinne E, Kirsch B, Mellinger U, Breitbarth H, Graser T. Influence of a continuous combined HRT (2 mg estradiol valerate and 2 mg dienogest) on postmenopausal depression. *Climacteric* 2004;7:301-11.
9. Schurmann R, Holler T, Benda N. Estradiol and drospirenone for climacteric symptoms in postmenopausal women: a double-blind, randomized, placebo-controlled study of the safety and efficacy of three dose regimens. *Climacteric* 2004;7:189-96.
10. Dayal M, Sammel MD, Zhao J, Hummel AC, Vandenbourn K, Barnhart KT. Supplementation with DHEA: effect on muscle size, strength, quality of life, and lipids. *J Womens Health (Larchmt)* 2005;14:391-400.
11. Drapier-Faure E, Azoulay C, Abramovici Y. [Acceptability of continuous combined versus cyclical HRT: a French multicentric randomized clinical study]. *Gynecol Obstet Fertil* 2005;33:498-504.
12. Levine DW, Dailey ME, Rockhill B, Tipping D, Naughton MJ, Shumaker SA. Validation of the Women's Health Initiative Insomnia Rating Scale in a multicenter controlled clinical trial. *Psychosom Med* 2005;67:98-104.
13. Elfitori A, Sherif F, Elmahaishi M, Chrystyn H. Two hormone replacement therapy (HRT) regimens for middle-eastern postmenopausal women. *Maturitas* 2005;52:52-9.
14. Heinrich AB, Wolf OT. Investigating the effects of estradiol or estradiol/progesterone treatment on mood, depressive symptoms, menopausal symptoms and subjective sleep quality in older healthy hysterectomized women: a questionnaire study. *Neuropsychobiology* 2005;52:17-23.
15. Haines CJ, Xing SM, Park KH, Holinka CF, Ausmanas MK. Prevalence of menopausal symptoms in different ethnic groups of Asian women and responsiveness to therapy with three doses of conjugated estrogens/medroxyprogesterone acetate: the Pan-Asia Menopause (PAM) study. *Maturitas* 2005;52:264-76.
16. Diem S, Grady D, Quan J, et al. Effects of ultralow-dose transdermal estradiol on postmenopausal symptoms in women aged 60 to 80 years. *Menopause* 2006;13:130-8.
17. Joffe H, Hall JE, Gruber S, et al. Estrogen therapy selectively enhances prefrontal cognitive processes: a randomized, double-blind, placebo-controlled study with functional magnetic resonance imaging in perimenopausal and recently postmenopausal women. *Menopause* 2006;13:411-22.
18. Reddy SY, Warner H, Guttuso T, Jr., et al. Gabapentin, estrogen, and placebo for treating hot flashes: a randomized controlled trial. *Obstet Gynecol* 2006;108:41-8.
19. Serrano D, Mariani L, Mora S, et al. Quality of life assessment in a chemoprevention trial: fenretinide and oral or transdermal HRT. *Maturitas* 2006;55:69-75.
20. LeBlanc ES, Neiss MB, Carello PE, Samuels MH, Janowsky JS. Hot flashes and estrogen therapy do not influence cognition in early menopausal women. *Menopause* 2007;14:191-202.
21. Maki PM, Gast MJ, Vieweg AJ, Burriss SW, Yaffe K. Hormone therapy in menopausal women with cognitive complaints: a randomized, double-blind trial. *Neurology* 2007;69:1322-30.



22. Pitkin J, Smetnik VP, Vadasz P, Mustonen M, Salminen K, Ylikangas S. Continuous combined hormone replacement therapy relieves climacteric symptoms and improves health-related quality of life in early postmenopausal women. *Menopause Int* 2007;13:116-23.
23. Hachul H, Bittencourt LR, Andersen ML, Haidar MA, Baracat EC, Tufik S. Effects of hormone therapy with estrogen and/or progesterone on sleep pattern in postmenopausal women. *Int J Gynaecol Obstet* 2008;103:207-12.
24. Kalleinen N, Polo O, Himanen SL, Joutsen A, Polo-Kantola P. The effect of estrogen plus progestin treatment on sleep: a randomized, placebo-controlled, double-blind trial in premenopausal and late postmenopausal women. *Climacteric* 2008;11:233-43.
25. Honjo H, Taketani Y. Low-dose estradiol for climacteric symptoms in Japanese women: a randomized, controlled trial. *Climacteric* 2009;12:319-28.
26. Baksu B, Baksu A, Goker N, Citak S. Do different delivery systems of hormone therapy have different effects on psychological symptoms in surgically menopausal women? A randomized controlled trial. *Maturitas* 2009;62:140-5.
27. Padua MA, Fonseca AM, Deguti MM, et al. Hormone therapy in Brazilian postmenopausal women with chronic hepatitis C: a pilot study. *Climacteric* 2010;13:179-86.
28. Joffe H, Petrillo LF, Koukopoulos A, et al. Increased estradiol and improved sleep, but not hot flashes, predict enhanced mood during the menopausal transition. *J Clin Endocrinol Metab* 2011;96:E1044-54.
29. Lin SQ, Sun LZ, Lin JF, et al. Estradiol 1 mg and drospirenone 2 mg as hormone replacement therapy in postmenopausal Chinese women. *Climacteric* 2011;14:472-81.
30. Sanchez Rodriguez MA, Zacarias Flores M, Arronte Rosales A, Mendoza Nunez VM. [Effect of hormone therapy with estrogens on oxidative stress and quality of life in postmenopausal women]. *Ginecol Obstet Mex* 2013;81:11-22.
31. Polisseni AF, Andrade AT, Ribeiro LC, et al. Effects of a continuous-combined regimen of low-dose hormone therapy (oestradiol and norethindrone acetate) and tibolone on the quality of life in symptomatic postmenopausal women: a double-blind, randomised study. *Maturitas* 2013;74:172-8.
32. Caglayan EK, Kara M, Etiz S, Kumru P, Aka N, Kose G. The effects of progesterone selection on psychological symptoms in hormone replacement therapy. *Adv Clin Exp Med* 2014;23:63-7.
33. Abraham L, Pinkerton JV, Messig M, Ryan KA, Komm BS, Mirkin S. Menopause-specific quality of life across varying menopausal populations with conjugated estrogens/bazedoxifene. *Maturitas* 2014;78:212-8.
34. Savolainen-Peltonen H, Hautamaki H, Tuomikoski P, Ylikorkala O, Mikkola TS. Health-related quality of life in women with or without hot flashes: a randomized placebo-controlled trial with hormone therapy. *Menopause* 2014;21:732-9.
35. Toffol E, Kalleinen N, Haukka J, Vakkuri O, Partonen T, Polo-Kantola P. The effect of hormone therapy on serum melatonin concentrations in premenopausal and postmenopausal women: a randomized, double-blind, placebo-controlled study. *Maturitas* 2014;77:361-9.
36. Ensrud KE, Guthrie KA, Hohensee C, et al. Effects of estradiol and venlafaxine on insomnia symptoms and sleep quality in women with hot flashes. *Sleep* 2015;38:97-108.
37. Kling JM, Lahr BA, Bailey KR, Harman SM, Miller VM, Mulvagh SL. Endothelial function in women of the Kronos Early Estrogen Prevention Study. *Climacteric* 2015;18:187-97.
38. Tansupwatdikul P, Chaikittisilpa S, Jaimchariyatam N, Panyakhamlerd K, Jaisamrarn U, Taechakraichana N. Effects of estrogen therapy on postmenopausal sleep quality regardless of vasomotor symptoms: a randomized trial. *Climacteric* 2015;18:198-204.
